# Supplementary material for: Molecular and Morphological Phylogenies of Spirorbinae (Serpulidae, Polychaeta, Annelida) and the Evolution of Brooding Modes
Source: MDPI journal article supplement (doi:10.3390/d16040237), 2024-04-17

Table S1. Primers

| Primer                                                                             | Position  | Forward/<br>Reverse | PCR/<br>Sequencing | Primer Sequence (5'-3')         | Reference                   |
|------------------------------------------------------------------------------------|-----------|---------------------|--------------------|---------------------------------|-----------------------------|
| <b>18S rDNA primers for outgroups, <i>Neomicrorbis</i> and <i>Helicosiphon</i></b> |           |                     |                    |                                 |                             |
| TimA                                                                               |           | F                   | P,S                | AMCTGGTTGATCCTGCCAG             | Norén and Jondelius (1999)  |
| 1100R2                                                                             |           | R                   | P,S                | CGGTATCTGATCGTCTTCGA            | Norén and Jondelius (1999)  |
| 18s2F                                                                              |           | F                   | P,S                | TAAAGYTGYTGCAGTTAAA             | Nygren and Sundberg (2003)  |
| 18s2R                                                                              |           | R                   | P,S                | ACCTTGTTAGCTGTTTACTTCCTC        | Nygren and Sundberg (2003)  |
| <b>18S rDNA primers, this study</b>                                                |           |                     |                    |                                 |                             |
| 18s1F                                                                              | 1-20      | F                   | P, S               | AYCTGGTTGATCCTGCCAGT            | Medlin <i>et al.</i> (1988) |
| 18s2F                                                                              | 673-688   | F                   | P, S               | TAAAGYTGYTGCAGTTAAA             | Nygren and Sundberg (2003)  |
| 18s1R                                                                              | 1214-1235 | R                   | P, S               | TASGACGGTATCTGATCGTCTT          | Nygren and Sundberg (2003)  |
| 18s2R                                                                              | 2050-2073 | R                   | P, S               | ACCTTGTTACGACTTTTACTTCCTC       | Nygren and Sundberg (2003)  |
| 18sFA                                                                              | 80-104    | F                   | P, S               | GGTCATTAATCATAYGTGATTT          | This study                  |
| 18sFB                                                                              | 333-353   | F                   | S                  | GCGACRTATCTTTYAAGCGTA           | This study                  |
| 18sFC                                                                              | 1085-1100 | F                   | S                  | AGGGACTGCCGGGGGC                | This study                  |
| 18sFD                                                                              | 1414-1434 | F                   | S                  | TTAATTTGACTCAACACGGG            | This study                  |
| 18sFE                                                                              | 1716-1738 | F                   | S                  | AGGTCTGTGATGCCCTTAGATGT         | This study                  |
| 18sRA                                                                              | 151-174   | R                   | S                  | GCTCTAGAATTRCCACAGTTATCC        | This study                  |
| 18sRB                                                                              | 473-493   | R                   | S                  | TTTRCGCGCCTGCGGCCTTCC           | This study                  |
| 18sRC                                                                              | 969-983   | R                   | S                  | TTCYATTATTCCATG                 | This study                  |
| 18sRD                                                                              | 1551-1569 | R                   | S                  | AGAGTCTCGTTCGTTATCG             | This study                  |
| 18sRE                                                                              | 1933-1960 | R                   | S                  | CCATCCAATCGGTAGTAGCGACGGGCGG    | This study                  |
| 18sFCR                                                                             | 1085-1100 | R                   | P, S               | GCCCCCGGCAGTCCCT                | This study                  |
| <b>28S rDNA primers, this study</b>                                                |           |                     |                    |                                 |                             |
| 28sF                                                                               | 8-26      | F                   | P, S               | ACCCSCTGAAYTTAAGCAT             | Brown <i>et al.</i> (1999)  |
| 28s R                                                                              |           | R                   | P, S               | AACTCTCTCMTTCARAGTTC            | Brown <i>et al.</i> (1999)  |
| Po28R4                                                                             | 1046–1069 | R                   | P, S               | GTT CAC CAT CTT TCG GGT CCC AAC | Struck <i>et al.</i> (2006) |

- Brown, A.C.; Rouse, G.W.; P. Hutchings, P.; Colgan, D. Assessing the usefulness of histone H3, U2 snRNA and 28S rDNA in analyses of polychaete relationships., *Australian Journal of Zoology* **1999**, *47*, 499 - 516.
- Medlin, L.; Elwood, H.J.; Stickel, S.; Sogin, M.L. The characterization of enzymatically amplified eukaryotic 16S-like rRNA coding regions. *Gene* **1988**, *71*, 491–499.
- Norén, M.; Jondelius, U. Phylogeny of the Prolecithophora (Platyhelminthes) Inferred from 18S rDNA Sequences. *Cladistics* **1999**, *15*, 103–112.
- Nygren, A.; Sundberg, P. Phylogeny and evolution of reproductive modes in Autolytinae (Syllidae, Annelida). *Mol. Phylogenet. Evol.* **2003**, *29*, 235–249.
- Struck, T.H.; Purschke, G.; Halanych, K.M. Phylogeny of Eunicida (Annelida) and Exploring Data Congruence Using a Partition Addition Bootstrap Alteration (PABA) Approach *Syst. Biol.* **2006** *55*, 1-20.

**Figure S1.** Maximum likelihood tree with branch lengths derived from the molecular-only concatenated datasets (18S rDNA, 28S rDNA). Numbers at nodes are bootstrap (BS) values. BS values below 50 and posterior probabilities below 0.7 are not shown.

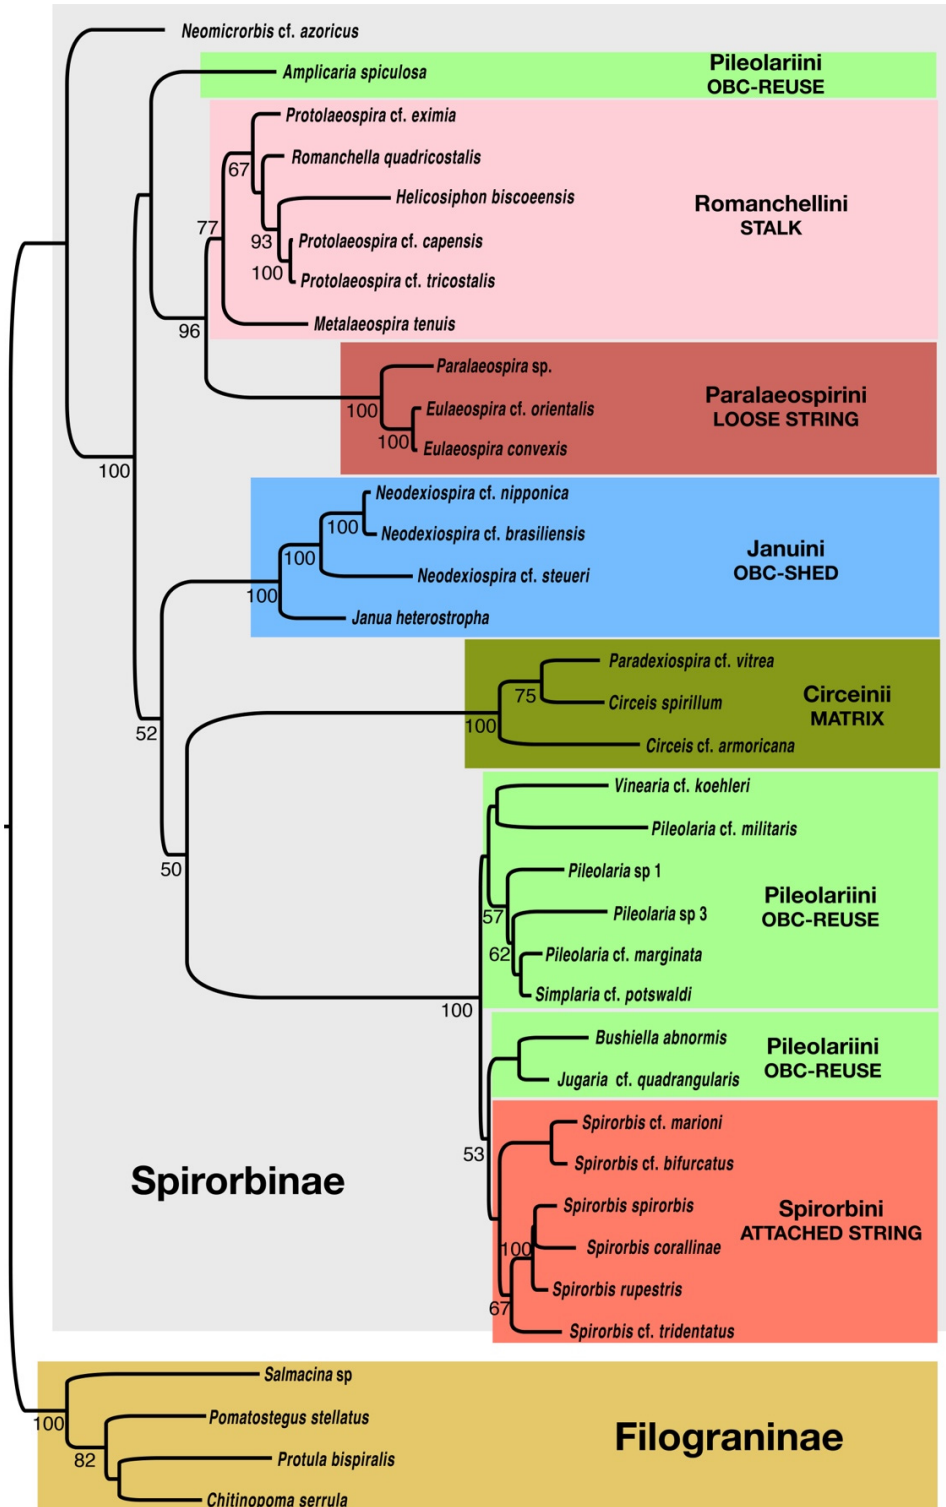

Supplement: s1 [file Table S1 and Figure S1.pdf › Table S1 and Figure S1.pdf]
